# Supplementary material for: Etiology of community acquired pneumonia among children in India: prospective, cohort study
Source: PubMed Central journal article supplement (PMC4623579; doi:10.7189/jogh.05.020418), 2015-12
Supplement: jogh-05-020418-s001.pdf [file jogh-05-020418-s001.pdf]

## Online Supplementary Document

Mathew et al. Etiology of community acquired pneumonia among children in India:  
prospective, cohort study

J Glob Health 2015;5:020418

**Table S1.** Pathogens identified through multiplex-PCR

| <b>Bacteria</b>              | <b>Viruses</b>                                 |
|------------------------------|------------------------------------------------|
| <i>S. pneumoniae</i>         | Influenza A,B,C                                |
| <i>H. influenzae</i>         | Parainfluenza 1,2,3,4                          |
| <i>S. aureus</i>             | RSV A,B                                        |
|                              | Rhinoviruses                                   |
| Atypical organisms           | Enteroviruses                                  |
| <i>Mycoplasma pneumoniae</i> | Coronaviruses OC43, 229E, NL63, HKU1           |
| <i>Chlamydia pneumoniae</i>  | Human metapneumovirus                          |
|                              | Parechovirus                                   |
|                              | Severe Acute Respiratory Syndrome (SARS) virus |
|                              | Adenovirus                                     |
|                              | Cytomegalovirus                                |

**Table S2.** Standardisation of PCR methodology for viruses and atypical organisms

|                                                               |
|---------------------------------------------------------------|
| <b>Viruses</b>                                                |
| Influenza A,B,C: QCMDINFRNA11                                 |
| Parainfluenza 1,2,3,4                                         |
| RSV A,B: QCMDRSVRNA11                                         |
| Rhinoviruses: QCMD RVRNA11                                    |
| Enteroviruses                                                 |
| Coronaviruses OC43, 229E, NL63, HKU1: QCMD CVRNA11            |
| Human metapneumovirus: QCMD MPVRNA2011                        |
| Parechovirus: QCMD 2013 Parechovirus RNA EQA programme        |
| Severe Acute Respiratory Syndrome (SARS) virus: QCMD CVRNA11  |
| Adenovirus: QCMD 2013 Adenovirus DNA EQA Programme,           |
| Cytomegalovirus: QCMD 2013 Cytomegalovirus DNA EQA programme, |
| Atypical organisms                                            |
| Mycoplasma pneumoniae: QCMDCP-MP12                            |
| Chlamydia pneumoniae: QCMDCP-MP12                             |

**Table S3.** Definitions of terms used in this study

|                                                                                                                                                                                                                                                                                                                                                                                                                                                                                                                   |
|-------------------------------------------------------------------------------------------------------------------------------------------------------------------------------------------------------------------------------------------------------------------------------------------------------------------------------------------------------------------------------------------------------------------------------------------------------------------------------------------------------------------|
| <ul style="list-style-type: none"><li>• Pneumonia was defined as per the IMCI definition [5-7] as cough or difficult breathing associated with fast breathing/tachypnea. Tachypnea was defined as Respiratory rate (counted twice for one full minute by trained research team members and re-confirmed by a trained medical officer) &gt;60/min for infants &lt;2 months; &gt;50/min for infants 2-12 months; &gt;40/min for children &gt;12-60 months; and &gt;30/min for children &gt;60-144 months.</li></ul> |
| <ul style="list-style-type: none"><li>• Severe pneumonia was defined as the presence of lower chest indrawing in a child with pneumonia.</li></ul>                                                                                                                                                                                                                                                                                                                                                                |
| <ul style="list-style-type: none"><li>• Very severe pneumonia was defined by the presence of any general danger sign (as per the IMCI criteria) such as inability to feed, dull/unresponsive, vomiting everything, seizures, central cyanosis or unconsciousness.</li></ul>                                                                                                                                                                                                                                       |
| <ul style="list-style-type: none"><li>• Cold season was defined from 16 November to 15 February; and Warm season from 16 February to 15 November.</li></ul>                                                                                                                                                                                                                                                                                                                                                       |
| <ul style="list-style-type: none"><li>• Acute malnutrition was defined as weight-for-age z score &lt;-3</li></ul>                                                                                                                                                                                                                                                                                                                                                                                                 |
| <ul style="list-style-type: none"><li>• Absent or deficient breastfeeding was defined as duration of breastfeeding &lt;6 months for infants older than six months; or less than infant's age for those &lt;6 months old.</li></ul>                                                                                                                                                                                                                                                                                |
| <ul style="list-style-type: none"><li>• Upper respiratory infection was defined as symptoms of common cold for less than 5 days duration viz runny nose, sneezing, dry cough, sore throat, with or without fever.</li></ul>                                                                                                                                                                                                                                                                                       |
| <ul style="list-style-type: none"><li>• Family history of TB was defined as diagnosed TB or history of taking anti-tuberculosis medication, in any family member/household contact.</li></ul>                                                                                                                                                                                                                                                                                                                     |
| <ul style="list-style-type: none"><li>• Predominant use of solid fuel was defined as usage of solid fuel (wood, coal or dried animal dung) as the main source of fuel used for cooking/heating purposes.</li></ul>                                                                                                                                                                                                                                                                                                |
| <ul style="list-style-type: none"><li>• Any use of solid fuel was defined as any usage of the above three solid fuels.</li></ul>                                                                                                                                                                                                                                                                                                                                                                                  |
| <ul style="list-style-type: none"><li>• Exposure to tobacco smoke at home was defined as current exposure to any family member/household contact smoking (any form of tobacco) indoors.</li></ul>                                                                                                                                                                                                                                                                                                                 |
| <ul style="list-style-type: none"><li>• WHO categorization of chest radiography [Q]: <b>Class I</b> = consolidation/pleural effusion; <b>Class II</b> = interstitial pattern/infiltrate; <b>Class III</b> = no consolidation/infiltrate/effusion; <b>Class IV</b> = radiograph quality not sufficient for reading.</li></ul>                                                                                                                                                                                      |
